# Supplementary material
Source: Springer Nature journal article supplement (https://www.springermedizin.de/resource/supplementary/12974_2011_384_MOESM5_ESM.pdf/9601554)

**A: IL-1 $\beta$** 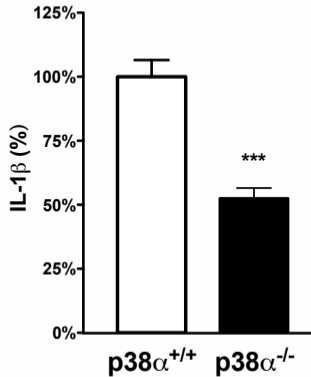**B: TNF $\alpha$** 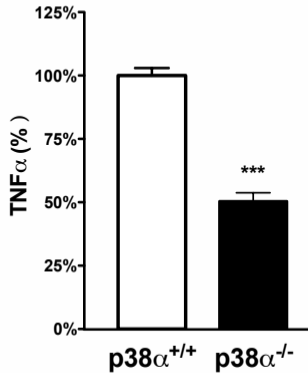**C:**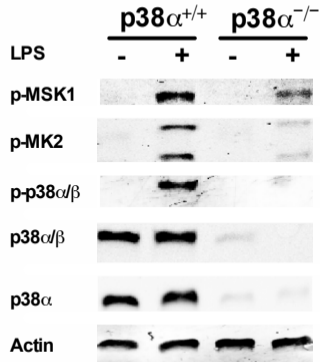

Supplement: MOESM5 [file 9601554]
